# Supplementary material for: Climate change drives warming in the Hudson River Estuary, New York (USA)
Source: Royal Society of Chemistry journal article supplement (doi:10.1039/c1em10053j), 2011-01-01

Climate change drives warming in the Hudson River Estuary, New York (USA)

David A. Seekell and Michael L. Pace

Supplemental Material

Figure S1. Time series plots of monthly average Hudson River water temperature at Poughkeepsie January to June (1946-2008). Note the clear upward trends in the summer months.

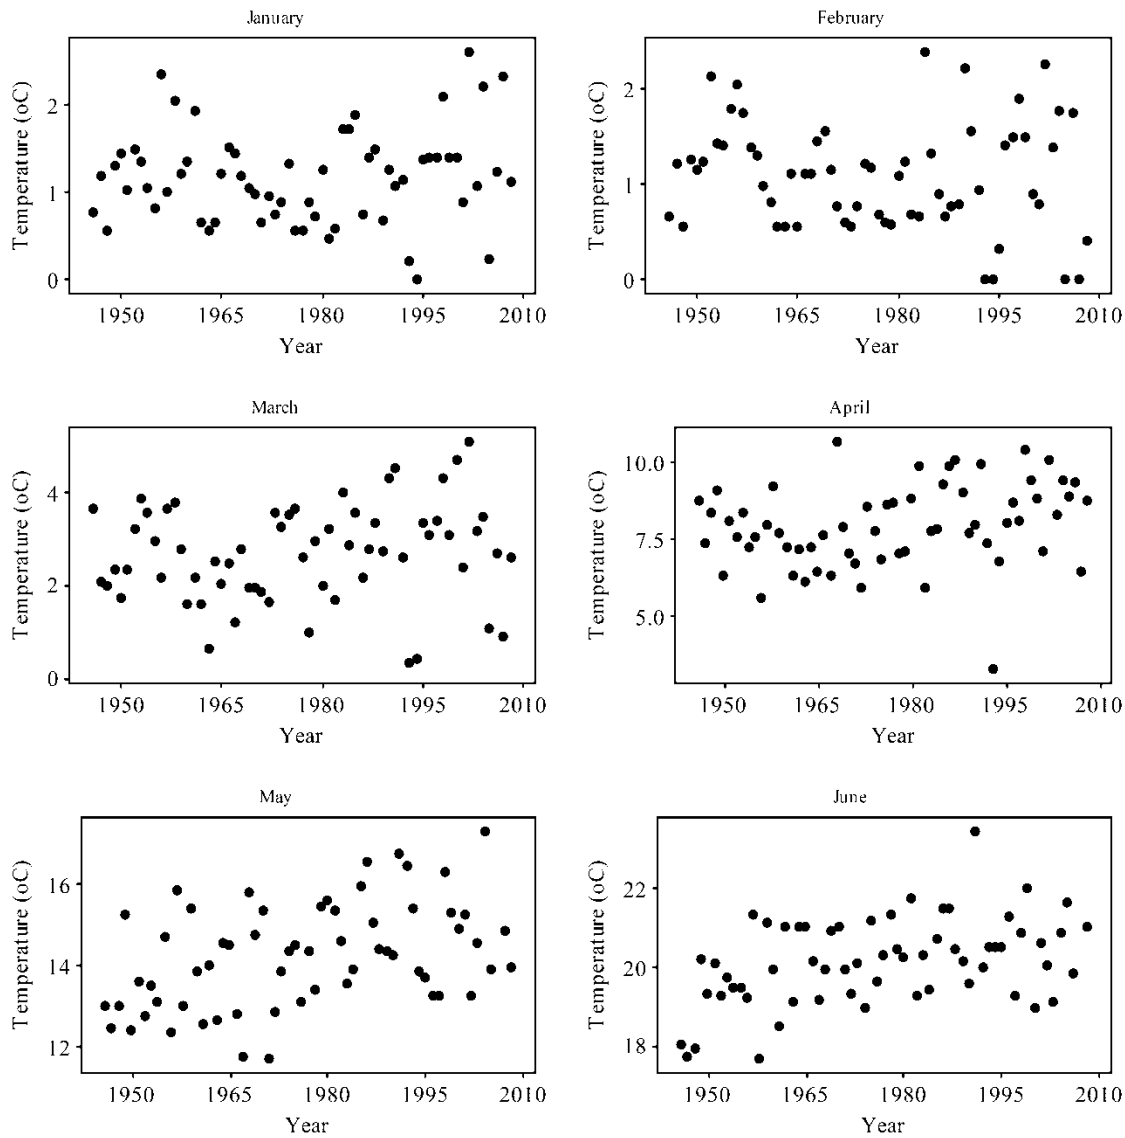

Figure S2. Time series plots of monthly average Hudson River water temperature at Poughkeepsie July to December (1946-2008). Note the clear upward trends in the summer months.

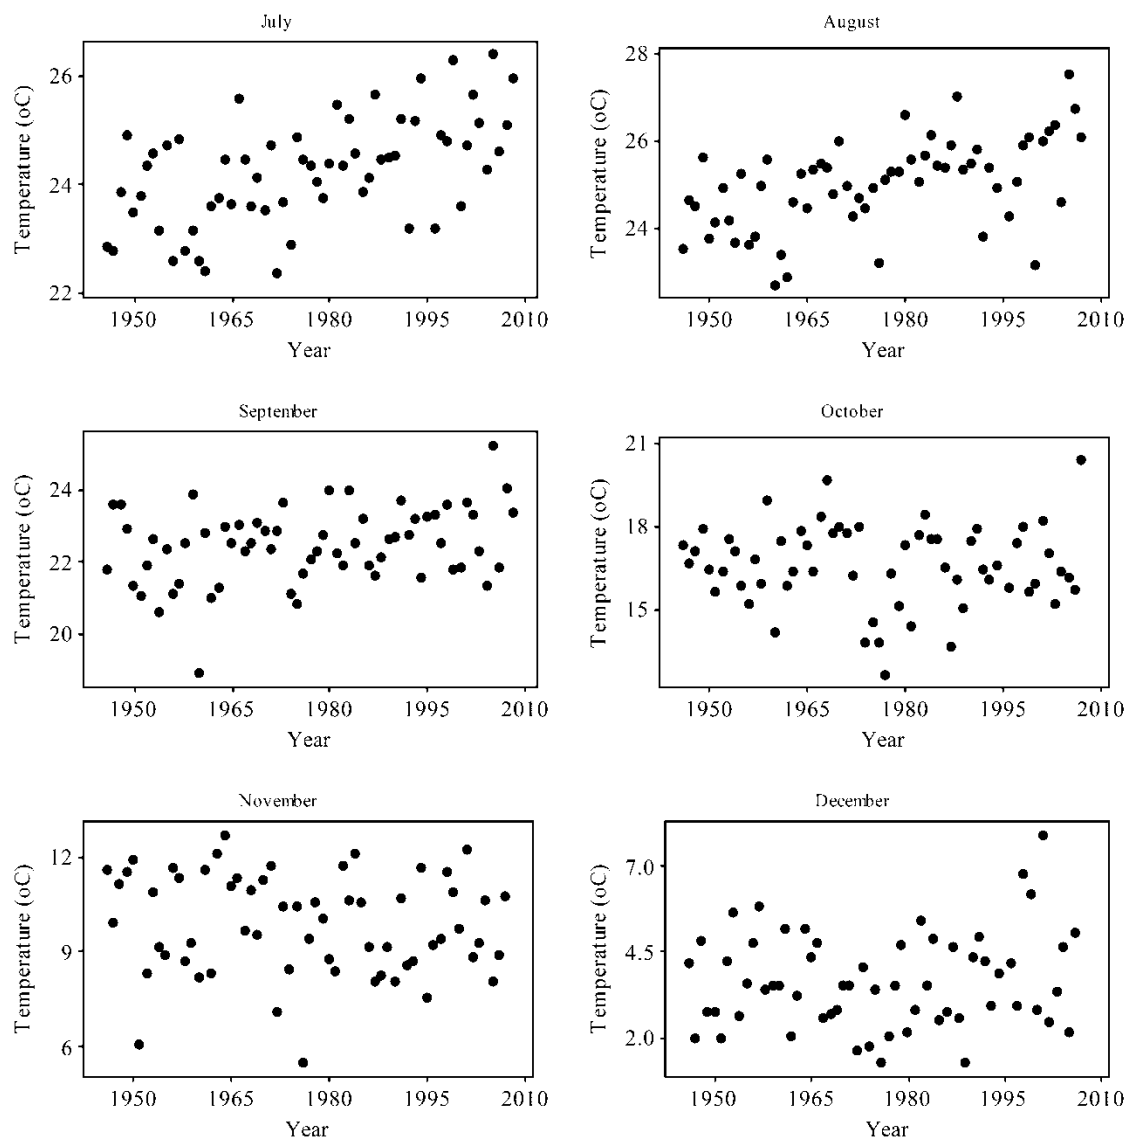

Figure S3. Annual mean air temperature (°C) recorded at Poughkeepsie, New York. The warming pattern of the 1920's and 1930's is inconsistent with the cool period found in the long-term Hudson River water temperature data set (see main text). Recent air warming is consistent with the warming trends observed in Hudson River water (see main text). The solid black line is a locally weighted smooth and the average temperature over this period (9.86°C) is the dashed horizontal line. The long-term warming pattern in air temperature at Poughkeepsie is consistent with long-term warming in this region<sup>48</sup>.

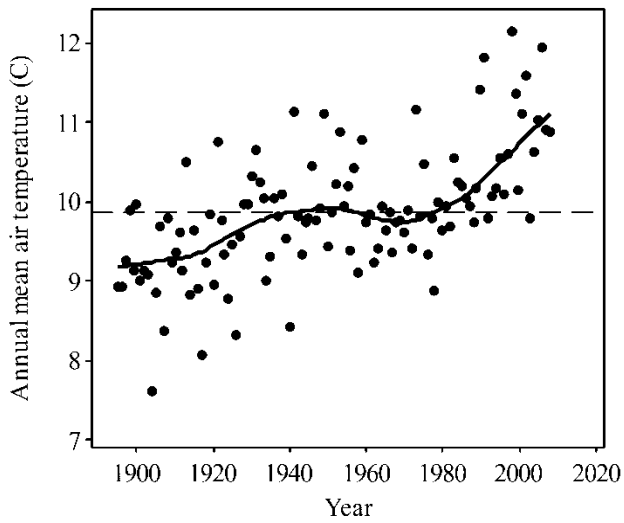

Supplement: c1em10053j.pdf [file c1em10053j.pdf]
